# Supplementary material
Source: Research Square preprint supplement (doi:10.21203/rs.3.rs-9503088/v1)
Supplement: Supplementary file 1 [file 5890e184957387dc04c2811a.docx]

**Table S1**

**Table S1:** Microorganisms used in this study: Diseases and Plant hosts

|  | **Disease name** | **Plant host** |
| --- | --- | --- |
| **Fungal Phytopathogens** | | |
| *Alternaria alternata* | Leaf spots, rots and blights | Tomatoes, broccoli, cabbage, apples, citric fruits, strawberries, Calendula, Pelargonium, sunflower, rape seeds, etc |
| *Botrytis cinerea* | Gray mold or grey mould | Grapes, strawberries, tomatoes, rhubarb Douglas-fir, lettuce, etc |
| *Fusarium oxysporum* | Vascular wilts | Tomato, onion, cucumber, soybean, bananas, asparagus, cotton, orchids, etc |
| *Penicillium charlesii* | Spoliage | Pinus, Coffee, banana, orchids, maize, |
| *Penicillium digitatum* | Green mould | Citrus species, Nazelnuts, black olives, rice, maize, etc |
| *Penicillium aurantiogriseum* | Spoliage, Blue-eye | Cereals, carrots, potatoes, onions, garlic, strawberry, apples, paprika, etc |
| **Bacterial species** | | |
| **Phytopathogens** | | |
| *Dickeya dadantii* | Blight and “soft rot” | Potato tubers, broccoli, onions, asparagus, celery, sugar cane, orchids, tulips, begonia, etc |
| *Erwinia amylovora* | Fireblight | Pears, apples, crabapples, loquat, quince, cotoneaster, raspberry, etc |
| Human and animal pathogens | | |
| *Escherichia coli* | Foodborne illness | Leafy greens (lettuce, spinach and sprouts), cucumber, etc |
| *Staphylococcus aureus* | Foodborne illness | Leafy greens (lettuce, spinach and sprouts) |
